# Supplementary material for: Genetic diversity and population structure analysis of Ethiopian bread wheat (Triticum eastivum L.) germplasm using SSR markers
Source: Research Square preprint supplement (doi:10.21203/rs.3.rs-4186694/v1), 2024-04-10
Supplement: Supplementary file 1 [file 3688c76b6f778bf5c729ae13.docx]

**Supplementary information**

**Additional file 1: Figure S1.** Estimated size of SSRs in base pairs (bp) generated across chromosomes over 96 Ethiopian bread wheat germplasm.

**Additional file 2: Figure S2.** Estimated distribution of major allelic frequency (MAF), Shannon diversity index (I), expected heterozygosity (He), Nei’s gene diversity (Gd), and polymorphic information content (PIC) of 2153 polymorphic SSRs generated from Ethiopian bread wheat germplasm.

**Additional file 3: Figure S3** Frequency distribution of Shannon diversity index (I), expected heterozygosity (He), and Nei’s gene diversity (Gd) indices across four populations of Ethiopian bread wheat germplasm.

**Additional file 4: Figure S4**. Comparison of allelic richness across the four populations and seven loci in the current study.

**S1** Estimated size of SSRs in base pairs (bp) generated across chromosomes over 96 Ethiopian bread wheat germplasm

**S2** Estimated distribution of major allelic frequency (MAF), Shannon diversity index (I), expected heterozygosity (He), Nei’s gene diversity (Gd), and polymorphic information content (PIC) of 2153 polymorphic SSRs generated from Ethiopian bread wheat germplasm

**S3** Frequency distribution of Shannon diversity index (I), expected heterozygosity (He), and Nei’s gene diversity (Gd) indices across four populations of Ethiopian bread wheat germplasm

**S 4** Comparison of allelic richness across the four populations and seven loci used in the bread wheat study
